# Supplementary material for: Negishi cross-coupling reaction catalyzed by an aliphatic, phosphine based pincer complex of palladium. biaryl formation via cationic pincer-type PdIV intermediates
Source: Royal Society of Chemistry journal article supplement (doi:10.1039/c1dt10398a), 2011-01-01
Supplement: c1dt10398a.pdf [file c1dt10398a.pdf]

# SUPPORTING INFORMATION

FOR

## **Negishi Cross-Coupling Reaction Catalyzed by an Aliphatic, Phosphine Based Pincer Complex of Palladium. Biaryl Formation via Cationic Pincer-type Pd<sup>IV</sup> Intermediates**

Roman Gerber,<sup>a</sup> Olivier Blacque<sup>a</sup> and Christian M. Frech<sup>\*a</sup>

Institute of Inorganic Chemistry, University of Zurich, Winterthurerstrasse 190, 8057 Zurich, Switzerland

Email: chfrech@aci.uzh.ch

## Computational Details.

Theoretical calculations for all reactants, intermediates and products were performed at the Density Functional level of theory with the Gaussian03 program package<sup>[1]</sup> using the hybrid *mPW1PW91* functional,<sup>[2]</sup> which includes modified Perdew-Wang exchange and Perdew-Wang 91 correlation,<sup>[3]</sup> in conjunction with the Stuttgart/Dresden ECPs (SDD) basis set for the Pd center,<sup>[4]</sup> the standard 6-31G basis set for the hydrogen atoms,<sup>[5]</sup> and the polarized 6-31G(d) basis set for the remaining atoms.<sup>[6]</sup> The *mPW1PW91* functional was selected for our study on the basis of many reported publications where the accuracy and reliability of the method is clearly demonstrated.<sup>[7]</sup> Pure basis functions (5d, 7f) were used in all calculations. Geometries were fully optimized without symmetry restrictions and for each optimized stationary point a frequency analysis was performed to verify its character (minimum or saddle point). In addition, single-point calculations were carried out for all optimized gas-phase geometries using the CPCM polarizable conductor calculation model.<sup>[8]</sup> N-methylpyrrolidone (NMP) was chosen as solvent of reaction and explicitly specified with a dielectric constant  $\epsilon$  of 32.0. The relative energies reported in our study correspond to the solvent-corrected electronic energies including the zero-point energy (ZPE) corrections obtained from the gas-phase frequency calculations.

- [1] Gaussian 03, Revision C.02, M. J. Frisch, G. W. Trucks, H. B. Schlegel, G. E. Scuseria, M. A. Robb, J. R. Cheeseman, J. A. Montgomery, Jr., T. Vreven, K. N. Kudin, J. C. Burant, J. M. Millam, S. S. Iyengar, J. Tomasi, V. Barone, B. Mennucci, M. Cossi, G. Scalmani, N. Rega, G. A. Petersson, H. Nakatsuji, M. Hada, M. Ehara, K. Toyota, R. Fukuda, J. Hasegawa, M. Ishida, T. Nakajima, Y. Honda, O. Kitao, H. Nakai, M. Klene, X. Li, J. E. Knox, H. P. Hratchian, J. B. Cross, V. Bakken, C. Adamo, J. Jaramillo, R. Gomperts, R. E. Stratmann, O. Yazyev, A. J. Austin, R. Cammi, C. Pomelli, J. W. Ochterski, P. Y. Ayala, K. Morokuma, G. A. Voth, P. Salvador, J. J. Dannenberg, V. G. Zakrzewski, S. Dapprich, A. D. Daniels, M. C. Strain, O. Farkas, D. K. Malick, A. D. Rabuck, K. Raghavachari, J. B. Foresman, J. V. Ortiz, Q. Cui, A. G. Baboul, S. Clifford, J. Cioslowski, B. B. Stefanov, G. Liu, A. Liashenko, P. Piskorz, I. Komaromi, R. L. Martin, D. J. Fox, T. Keith, M. A. Al-Laham, C. Y. Peng, A. Nanayakkara, M. Challacombe, P. M. W. Gill, B. Johnson, W. Chen, M. W. Wong, C. Gonzalez, J. A. Pople, Gaussian Inc., Wallingford, CT, 2004.
- [2] C. Adamo, V. Barone, *J. Chem. Phys.* 1998, 108, 664.

- [3] a) J. P. Perdew, K. Burke, Y. Wang, *Phys. Rev. B* **1996**, *54*, 16533; b) K. Burke, J. P. Perdew, Y. Wang, in *Electronic Density Functional Theory: Recent Progress and New Directions* (Eds.: J. F. Dobson, G. Vignale, M. P. Das), Plenum Press, New York, 1998.
- [4] D. Andrae, U. Haussermann, M. Dolg, H. Stoll, H. Preuss, *Theor. Chim. Acta* **1990**, *77*, 123.
- [5] W. J. Hehre, R. Ditchfield, J. A. Pople, *J. Chem. Phys.* **1972**, *56*, 2257.
- [6] P. C. Hariharan, J. A. Pople, *Chem. Phys. Lett.* **1972**, *16*, 217.
- [7] Selected articles: (a) Y. Zhao, D. G. Truhlar, *J. Chem. Theory Comput.* **2008**, *4* (11), 1849. (b) N. E. Schultz, B. F. Gherman, C. J. Cramer, D. G. Truhlar, *J. Phys. Chem. B* **2006**, *110* (47), 24030. (c) A. Sundermann, O. Uzan, J. M. L. Martin, *Chem. Eur. J.* **2001**, *7*(8), 1703. (d) R. Wysokinski, D. Michalska, *J. Comput. Chem.* **2001**, *22*, 901. (e) L. Fuksa, N. Sadlej-Sosnowska, K. Samochocka, W. Starosta, *J. Molec. Struct.* **2005**, *740*, 229. (f) O. Blacque, C. M. Frech *Chem. Eur. J.* **2010**, *16*, 1521.
- [8] a) V. Barone, M. Cossi, *J. Phys. Chem. A* **1998**, *102*, 1995; b) M. Cossi, N. Rega, G. Scalmani, V. Barone, *J. Comput. Chem.* **2003**, *24*, 669.

### Cartesian coordinates of [Pd]-Cl (1)

#### GEOMETRY OPTIMIZATION

Final Geometry (x,y,z in Angstrom)

|    |             |             |             |    |             |             |             |
|----|-------------|-------------|-------------|----|-------------|-------------|-------------|
| H  | 3.74112600  | -1.93111000 | -4.09225800 | C  | -2.78228200 | 4.31791600  | 0.54335100  |
| H  | -2.29186000 | -2.53341100 | -4.36065900 | H  | -1.40017600 | -2.54111100 | 0.14185000  |
| H  | -3.39138700 | -1.16382600 | -4.31190100 | H  | 5.05632100  | -1.14785000 | 0.65463300  |
| H  | -4.68485100 | -3.26888000 | -4.12807800 | P  | 2.31337700  | 0.03705200  | 0.28248800  |
| H  | 5.94359800  | -2.77421500 | -3.23471400 | H  | 2.50507200  | 4.87175400  | -0.22309700 |
| C  | -2.98403200 | -1.98774800 | -3.70953500 | H  | 1.08165600  | -2.65998500 | 0.36961000  |
| C  | 3.91117800  | -2.04716200 | -3.01613700 | C  | -4.28227000 | 4.35882700  | 0.82886900  |
| H  | 5.80936400  | -1.02799400 | -3.07060800 | C  | -2.22212300 | 2.89876100  | 0.66174300  |
| H  | 3.52955500  | -3.04189700 | -2.74480600 | C  | 3.44375000  | 4.60463500  | 0.28001000  |
| C  | -4.12509900 | -2.89849000 | -3.26160000 | C  | 3.22822800  | 1.64600200  | 0.50449600  |
| C  | 5.40516000  | -0.98131800 | -2.70309100 | H  | -2.24457000 | 4.98624400  | 1.22560500  |
| H  | -1.43381700 | -0.72660400 | -2.85629000 | H  | 3.98947600  | 5.53998700  | 0.44928000  |
| H  | -3.70702400 | -3.78141300 | -2.75842200 | H  | -0.33630000 | -4.52373300 | 1.16742300  |
| H  | -5.57112100 | -1.35665900 | -2.83638700 | H  | -4.68150300 | 1.59361500  | 1.05187100  |
| H  | 3.41555100  | 0.13480000  | -2.61192400 | H  | 4.17464400  | 1.41281200  | 1.01617500  |
| H  | 2.05405400  | -1.06388200 | -2.45471500 | C  | -1.49931900 | -2.70595900 | 1.22156700  |
| C  | -2.22098200 | -1.40682700 | -2.51861600 | C  | 0.97990600  | -2.83572800 | 1.44779200  |
| C  | 3.12577000  | -0.98006900 | -2.25215400 | H  | -2.45257200 | -3.22728100 | 1.38920900  |
| C  | -5.06382600 | -2.17094200 | -2.30063100 | H  | -4.45974100 | 4.08288200  | 1.87783900  |
| H  | -3.62108600 | 0.15726900  | -2.14025000 | H  | 1.83034000  | -3.45598600 | 1.76540700  |
| H  | -1.72138700 | -2.22087600 | -1.97638400 | H  | 1.44008500  | 2.77013200  | 0.90907300  |
| H  | -5.85019200 | -2.84736500 | -1.94570700 | H  | -2.29613900 | 2.57039100  | 1.70837300  |
| C  | 5.65997700  | -2.08834100 | -1.20003300 | H  | -3.62948700 | -1.02542400 | 1.48051500  |
| H  | 6.73110000  | -1.99830200 | -0.98485300 | C  | -0.33670900 | -3.57203500 | 1.71333000  |
| H  | 5.35334400  | -3.08388000 | -0.84995600 | C  | -2.67758300 | -0.48455800 | 1.46587700  |
| C  | -3.17193600 | -0.66726300 | -1.56701600 | H  | 3.19540700  | -1.40845800 | 2.09743800  |
| H  | 4.16244900  | 1.69268600  | -1.46181600 | C  | 2.40784800  | 2.59241400  | 1.39528900  |
| H  | -4.94795500 | 3.72805900  | -1.12183600 | C  | -0.17369300 | -0.61697700 | 1.71046500  |
| H  | 4.42935600  | 4.14569200  | -1.59419400 | C  | 2.32925400  | -0.74892200 | 1.96336900  |
| H  | -2.80032200 | 2.23837500  | -1.28360900 | C  | 3.12456700  | 3.92655500  | 1.60996400  |
| H  | 2.59834100  | 2.48508200  | -1.37979200 | C  | -1.51365500 | -1.35411300 | 1.95168800  |
| C  | -4.30780600 | -1.58723100 | -1.10320300 | C  | 1.00727500  | -1.49070200 | 2.19412100  |
| C  | 3.38536000  | -1.09477700 | -0.74379100 | H  | -2.78824100 | 0.37685900  | 2.13776900  |
| H  | 3.03456000  | -2.08995900 | -0.43370900 | H  | 4.05711700  | 3.75427300  | 2.16560700  |
| H  | 5.27321300  | -0.03206100 | -0.68782700 | H  | -0.18553000 | 0.29944600  | 2.32787000  |
| H  | -2.59461600 | 4.69023000  | -0.47249900 | H  | 2.19029500  | 2.13165100  | 2.36538900  |
| C  | 4.88403400  | -1.02229000 | -0.42125400 | H  | 2.42608300  | 0.05520500  | 2.70221800  |
| C  | 3.53748200  | 2.33391300  | -0.83352300 | H  | 2.50482300  | 4.57962300  | 2.23530000  |
| H  | -5.03222600 | 1.30675900  | -0.64918600 | C  | -0.49364600 | -3.83817200 | 3.21333100  |
| H  | -3.89025600 | -2.40965100 | -0.50833400 | H  | -1.42825000 | -4.38124800 | 3.40461500  |
| C  | 4.24823500  | 3.67299300  | -0.62236800 | H  | 0.32603500  | -4.47303200 | 3.57394800  |
| H  | -5.00583200 | -1.05046400 | -0.45038800 | C  | -1.65757800 | -1.63638000 | 3.46271300  |
| C  | -5.03880600 | 3.39234800  | -0.08000400 | C  | 0.82980800  | -1.77737100 | 3.70105600  |
| C  | -2.98326500 | 1.92471400  | -0.25475500 | H  | -2.61254600 | -2.14279300 | 3.66117600  |
| Pd | 0.05325900  | 0.19382500  | -0.19024300 | H  | 1.66735400  | -2.38665100 | 4.06892800  |
| H  | 5.23523700  | 3.49599400  | -0.17134700 | C  | -0.49455200 | -2.50097200 | 3.96213900  |
| H  | -6.10867900 | 3.39798100  | 0.15869200  | H  | -1.68137900 | -0.68468200 | 4.01100200  |
| P  | -2.24605600 | 0.21955700  | -0.19492800 | H  | 0.85725400  | -0.82965100 | 4.25578400  |
| C  | -4.49015400 | 1.96737000  | 0.03636600  | H  | -0.60832700 | -2.67870200 | 5.03874800  |
| H  | -4.66727500 | 5.37725600  | 0.70427600  | Cl | 0.19302300  | 1.39493600  | -2.29484400 |
| H  | -1.16033500 | 2.88371100  | 0.39542100  |    |             |             |             |

After PCM corrections, the SCF energy is -2679.34381072 a.u.

|                                              |                             |
|----------------------------------------------|-----------------------------|
| Zero-point correction=                       | 0.928798 (Hartree/Particle) |
| Thermal correction to Energy=                | 0.968663                    |
| Thermal correction to Enthalpy=              | 0.969607                    |
| Thermal correction to Gibbs Free Energy=     | 0.857741                    |
| Sum of electronic and zero-point Energies=   | -2678.401015                |
| Sum of electronic and thermal Energies=      | -2678.361150                |
| Sum of electronic and thermal Enthalpies=    | -2678.360206                |
| Sum of electronic and thermal Free Energies= | -2678.472072                |

### Cartesian coordinates of [Pd]<sup>+</sup> (B)

#### GEOMETRY OPTIMIZATION

Final Geometry (x,y,z in Angstrom)

|    |             |             |             |   |             |             |             |
|----|-------------|-------------|-------------|---|-------------|-------------|-------------|
| H  | -3.68471500 | -1.03376100 | 4.51616400  | H | 4.68692100  | 1.11446800  | -1.54161600 |
| H  | 2.63821800  | -1.70620200 | 4.59984000  | C | 4.92585200  | 3.23846200  | -1.19224100 |
| H  | 3.73576900  | -0.39024400 | 4.20893600  | H | 1.22058600  | -2.53541800 | 0.27003400  |
| H  | 4.99728700  | -2.51390700 | 4.31048100  | H | -5.24976100 | -0.73678900 | -0.21160200 |
| H  | -6.01129700 | -1.74131700 | 3.90702500  | P | -2.39607500 | 0.15481800  | -0.17693600 |
| C  | 3.27568100  | -1.30259000 | 3.80615500  | H | -1.96389100 | 4.98632700  | -0.48293400 |
| C  | -3.94098500 | -1.27719400 | 3.47978300  | H | -1.29894600 | -2.54419800 | 0.18909800  |
| H  | -5.72084600 | -0.05807900 | 3.49678600  | C | 4.58530100  | 4.29534300  | -0.14361500 |
| H  | -3.67983300 | -2.33422000 | 3.33317900  | C | 4.45461000  | 1.84691800  | -0.75995000 |
| C  | 4.37104400  | -2.30190500 | 3.43808200  | C | -2.99010100 | 4.77135200  | -0.81168000 |
| C  | -5.43850400 | -1.08826700 | 3.24088700  | C | -3.14114700 | 1.81035300  | -0.58255400 |
| H  | 1.66816100  | -0.18637900 | 2.87587000  | H | 6.00439700  | 3.21758400  | -1.37966200 |
| H  | 3.91100000  | -3.25538200 | 3.14514800  | H | -3.44671700 | 5.73524800  | -1.05782400 |
| H  | 5.77889700  | -0.88816900 | 2.61587300  | H | -0.01907000 | -4.59272300 | -0.29133900 |
| H  | -3.26470300 | 0.64034600  | 2.76266500  | H | 3.08383000  | 2.64824300  | 1.56517300  |
| H  | -2.03553900 | -0.61641700 | 2.67995000  | H | -4.17131400 | 1.62771100  | -0.91962300 |
| C  | 2.41711000  | -0.93668800 | 2.59386600  | C | 1.23645700  | -2.90892600 | -0.76224800 |
| C  | -3.10380200 | -0.41139300 | 2.52771700  | C | -1.25910700 | -2.92280000 | -0.81168000 |
| C  | 5.22870500  | -1.78007200 | 2.28748500  | H | 2.14845200  | -3.50862800 | -0.87716400 |
| H  | 3.78569800  | 0.49956100  | 1.79878800  | H | 5.15421600  | 4.09373900  | 0.77397700  |
| H  | 1.86073300  | -1.82253600 | 2.26055900  | H | -2.15668400 | -3.53356900 | -1.00117700 |
| H  | 5.98128700  | -2.52250200 | 2.00218900  | H | -1.31535700 | 2.60864200  | -1.41444500 |
| C  | -5.80804700 | -1.36617300 | 1.78544600  | H | 5.01333600  | 1.54392900  | 0.13536000  |
| H  | -6.87518200 | -1.18567400 | 1.61945500  | H | 3.42830000  | -1.44908600 | -1.46514300 |
| H  | -5.63081200 | -2.42586100 | 1.55760400  | C | 0.00046500  | -3.77776200 | -1.01558000 |
| C  | 3.28534400  | -0.41139300 | 1.44077000  | C | 2.51346100  | -0.85119300 | -1.51062500 |
| H  | -3.77097800 | 2.26281900  | 1.45509400  | H | -3.42829200 | -1.50052300 | -1.68767900 |
| H  | 2.52784800  | 4.61017500  | -0.71165800 | C | -2.36613800 | 2.49720600  | -1.71879700 |
| H  | -3.74172200 | 4.72440800  | 1.22203100  | C | -0.00261800 | -0.89116100 | -1.61947100 |
| H  | 2.40874300  | 2.11516600  | -1.36925200 | C | -2.52238300 | -0.88445600 | -1.70025400 |
| H  | -2.15871100 | 2.83902200  | 1.04666700  | C | -2.94953400 | 3.87399300  | -2.04529200 |
| C  | 4.37579700  | -1.42467300 | 1.06705700  | C | 1.28020300  | -1.72867100 | -1.74491300 |
| C  | -3.48478100 | -0.70266200 | 1.06798600  | C | -1.26065000 | -1.74707300 | -1.83432700 |
| H  | -3.26217700 | -1.76287000 | 0.88063100  | H | 2.63133800  | -0.14871700 | -2.34578300 |
| H  | -5.24950600 | 0.55325500  | 0.98686300  | H | -3.96595100 | 3.75094800  | -2.44199700 |
| H  | 4.44799300  | 3.50041100  | -2.14572100 | H | 0.01870800  | -0.05210100 | -2.33133800 |
| C  | -4.98705600 | -0.49986500 | 0.82643200  | H | -2.36619700 | 1.87919100  | -2.62307200 |
| C  | -3.18020400 | 2.71992700  | 0.65610400  | H | -2.60288400 | -0.21677600 | -2.56471400 |
| H  | 1.52567700  | 2.92767400  | 0.79023500  | H | -2.35915600 | 4.33940100  | -2.84165000 |
| H  | 3.90605000  | -2.33867900 | 0.68137200  | C | 0.05310400  | -4.34053400 | -2.43893300 |
| C  | -3.75570000 | 4.09850500  | 0.32359800  | H | 0.94289200  | -4.96878900 | -2.56448600 |
| H  | 5.01342100  | -1.03114800 | 0.26766000  | H | -0.81778400 | -4.97977700 | -2.62623000 |
| C  | 3.09177600  | 4.29601700  | 0.17698300  | C | 1.30872500  | -2.30407000 | -3.18310400 |
| C  | 2.95134700  | 1.85147800  | -0.44874000 | C | -1.18045200 | -2.32828400 | -3.26785200 |
| Pd | -0.07807800 | 0.18024600  | 0.14437900  | H | 2.22863000  | -2.88842500 | -3.31251600 |
| H  | -4.81015000 | 3.98788000  | 0.03761400  | H | -2.07822500 | -2.93097700 | -3.45561700 |
| H  | 2.86860100  | 5.02503400  | 0.96295300  | C | 0.07917400  | -3.17999500 | -3.43793800 |
| P  | 2.25673500  | 0.18860800  | -0.00224600 | H | 1.34847600  | -1.48184800 | -3.90946100 |
| C  | 2.60817000  | 2.90954000  | 0.60994600  | H | -1.18870400 | -1.50893400 | -3.99838500 |
| H  | 4.89656900  | 5.28585100  | -0.49041700 | H | 0.11806400  | -3.56931400 | -4.46129300 |

After PCM corrections, the SCF energy is -2218.93891723 a.u.

|                                              |                             |
|----------------------------------------------|-----------------------------|
| Zero-point correction=                       | 0.927666 (Hartree/Particle) |
| Thermal correction to Energy=                | 0.965999                    |
| Thermal correction to Enthalpy=              | 0.966943                    |
| Thermal correction to Gibbs Free Energy=     | 0.857395                    |
| Sum of electronic and zero-point Energies=   | -2217.962798                |
| Sum of electronic and thermal Energies=      | -2217.924464                |
| Sum of electronic and thermal Enthalpies=    | -2217.923520                |
| Sum of electronic and thermal Free Energies= | -2218.033069                |

**Cartesian coordinates of [Pd]-Ph (2)**

GEOMETRY OPTIMIZATION

Final Geometry (x,y,z in Angstrom)

|   |             |             |            |   |             |            |            |
|---|-------------|-------------|------------|---|-------------|------------|------------|
| H | 4.01070200  | 0.69438500  | 4.27029200 | C | -3.24577100 | 0.60465600 | 4.03145900 |
| H | -2.63123300 | 0.96208300  | 4.86567700 | C | 4.12358400  | 1.16226400 | 3.28573500 |
| H | -3.51543900 | -0.43415600 | 4.26713600 | H | 5.98781900  | 0.16252700 | 2.86851600 |
| H | -5.11295100 | 1.37013100  | 4.82813200 | H | 3.76129400  | 2.19515500 | 3.38726600 |
| H | 6.18709100  | 1.74813800  | 3.60459900 | C | -4.51767500 | 1.44278900 | 3.91075900 |

|    |             |             |             |   |             |             |             |
|----|-------------|-------------|-------------|---|-------------|-------------|-------------|
| C  | 5.59395900  | 1.18829700  | 2.87257100  | H | -2.28112500 | -3.49814000 | -3.59919400 |
| H  | -1.54607300 | -0.01436200 | 2.83753900  | H | 4.12818700  | -4.70922100 | -2.61876300 |
| H  | -4.24389800 | 2.50097000  | 3.79801900  | H | -0.23485800 | 4.84525500  | 0.63023600  |
| H  | -5.72642900 | -0.00716100 | 2.86574800  | H | -4.81857000 | -0.81231000 | -1.63337900 |
| H  | 3.51223300  | -0.64044200 | 2.26409400  | H | 4.14118300  | -0.66705100 | -1.65525500 |
| H  | 2.20366200  | 0.48443200  | 2.54436200  | C | -1.46254200 | 3.23198600  | -0.11630200 |
| C  | -2.42596900 | 0.62458100  | 2.73950100  | C | 1.01603300  | 3.38600600  | -0.35477000 |
| C  | 3.25775900  | 0.42565300  | 2.26157300  | H | -2.40105700 | 3.79804500  | -0.02340100 |
| C  | -5.34822300 | 1.01174700  | 2.70392300  | H | -4.58497900 | -2.59351700 | -3.58478300 |
| H  | -3.59744500 | -0.86692300 | 1.76797800  | H | 1.88066300  | 4.06294300  | -0.42042900 |
| H  | -2.06247900 | 1.64430600  | 2.55741700  | H | 1.45550700  | -2.07859400 | -2.00108700 |
| H  | -6.22746500 | 1.65722300  | 2.59425900  | H | -2.52309500 | -1.16171400 | -2.84817600 |
| C  | 5.75997100  | 1.79483500  | 1.48050300  | H | -3.64295700 | 1.83565900  | -0.94528100 |
| H  | 6.81373100  | 1.78097600  | 1.17863700  | C | -0.28033900 | 4.19657200  | -0.25387300 |
| H  | 5.45490100  | 2.85011100  | 1.50523000  | C | -2.71170900 | 1.32492800  | -1.21042100 |
| C  | -3.27090400 | 0.16049400  | 1.54682300  | H | 3.16226600  | 2.26466400  | -1.64784100 |
| H  | 4.21253700  | -1.81552300 | 0.56105000  | C | 2.40323500  | -1.69655700 | -2.40131200 |
| H  | -4.79036600 | -3.74312000 | -0.75702200 | C | -0.21813600 | 1.49094700  | -1.43598600 |
| H  | 4.58886200  | -4.13073500 | -0.21737900 | C | 2.26401800  | 1.63752000  | -1.70994000 |
| H  | -2.70748200 | -2.36751600 | -0.04717900 | C | 3.15869100  | -2.83018900 | -3.09710000 |
| H  | 2.68458100  | -2.60543500 | 0.21265600  | C | -1.53352000 | 2.29418300  | -1.33157800 |
| C  | -4.52044500 | 1.04264500  | 1.41675900  | C | 0.97636500  | 2.45609900  | -1.57955800 |
| C  | 3.43766600  | 1.01610100  | 0.85945800  | H | -2.88078600 | 0.84476900  | -2.18220100 |
| H  | 3.09892600  | 2.06003400  | 0.90998200  | H | 4.06285600  | -2.42542900 | -3.57308100 |
| H  | 5.30099000  | 0.02584100  | 0.34967300  | H | -0.27217400 | 0.90124100  | -2.37108800 |
| H  | -2.46838700 | -4.08077800 | -1.94879900 | H | 2.14256700  | -0.92439500 | -3.13332500 |
| C  | 4.91553100  | 1.04808400  | 0.44433600  | H | 2.27974300  | 1.15524100  | -2.69458200 |
| C  | 3.59731800  | -2.21339800 | -0.25109100 | H | 2.54109900  | -3.24357900 | -3.90299400 |
| H  | -5.01507300 | -1.41903900 | 0.00881600  | C | -0.45680800 | 5.05248300  | -1.51183100 |
| H  | -4.20799000 | 2.07707500  | 1.22239900  | H | -1.37537500 | 5.64915100  | -1.43733200 |
| C  | 4.35389900  | -3.34690400 | -0.94622100 | H | 0.37795300  | 5.75896600  | -1.60910600 |
| H  | -5.13952500 | 0.73807500  | 0.56650800  | C | -1.70344700 | 3.17167600  | -2.59068300 |
| C  | -4.99323700 | -2.95982500 | -1.49998800 | C | 0.78503800  | 3.33417000  | -2.83497400 |
| C  | -2.99120500 | -1.59340400 | -0.77596200 | H | -2.64141300 | 3.74297900  | -2.53574300 |
| Pd | 0.02948300  | -0.06065500 | 0.01017000  | H | 1.63471600  | 4.02164500  | -2.95613500 |
| H  | 5.31557300  | -2.96791600 | -1.32074300 | C | -0.51901000 | 4.13428400  | -2.73682600 |
| H  | -6.08008700 | -2.93695000 | -1.64091100 | H | -1.77391600 | 2.52669700  | -3.47733700 |
| P  | -2.27186200 | -0.04342700 | -0.02941700 | H | 0.76484100  | 2.69176700  | -3.72603500 |
| C  | -4.51541700 | -1.61423000 | -0.94554400 | H | -0.64766200 | 4.73645100  | -3.64508100 |
| H  | -4.62075800 | -4.30041300 | -3.16063000 | C | 0.17883200  | -1.17848000 | 1.25026900  |
| H  | -1.21355300 | -1.93046000 | -1.96733400 | C | 0.02998900  | -3.04482700 | 0.70349400  |
| C  | -2.77424900 | -3.28671900 | -2.64334900 | C | 0.39771200  | -1.72157100 | 2.63986900  |
| H  | -1.34272400 | 2.63810100  | 0.79850400  | C | 0.09828500  | -4.20887300 | 1.47190200  |
| H  | 5.03158000  | 1.51910900  | -0.53889000 | H | -0.13943000 | -3.15754900 | -0.36650000 |
| P  | 2.28150900  | 0.29023000  | -0.42695800 | C | 0.46661900  | -2.87387600 | 3.42483500  |
| H  | 2.64570700  | -4.40436900 | -1.71854500 | H | 0.52503300  | -0.76453600 | 3.14176500  |
| H  | 1.12887400  | 2.78758100  | 0.55763500  | C | 0.31793700  | -4.13038600 | 2.84432100  |
| C  | -4.29252600 | -3.31551700 | -2.80954100 | H | -0.02101200 | -5.17922900 | 0.99480900  |
| C  | -2.30030000 | -1.93703300 | -2.10250100 | H | 0.63853700  | -2.78741300 | 4.49538300  |
| C  | 3.55362300  | -3.92649100 | -2.11020100 | H | 0.37147300  | -5.03064500 | 3.44950600  |
| C  | 3.21889700  | -1.10289300 | -1.24194400 |   |             |             |             |

After PCM corrections, the SCF energy is -2450.64729869 a.u.

```

pdph.com.log: Zero-point correction= 1.017810 (Hartree/Particle)
pdph.com.log- Thermal correction to Energy= 1.061342
pdph.com.log- Thermal correction to Enthalpy= 1.062286
pdph.com.log- Thermal correction to Gibbs Free Energy= 0.941922
pdph.com.log- Sum of electronic and zero-point Energies= -2449.623602
pdph.com.log- Sum of electronic and thermal Energies= -2449.580070
pdph.com.log- Sum of electronic and thermal Enthalpies= -2449.579126
pdph.com.log- Sum of electronic and thermal Free Energies= -2449.699490
    
```

### Cartesian coordinates of [Pd]-Cl..ZnClPh

#### GEOMETRY OPTIMIZATION

Final Geometry (x,y,z in Angstrom)

|   |             |             |             |   |             |             |             |
|---|-------------|-------------|-------------|---|-------------|-------------|-------------|
| H | 1.61813600  | -2.51102100 | -4.18775800 | H | 4.04265000  | -2.75289700 | -3.86914900 |
| H | -1.94648700 | -3.49059900 | -3.46480800 | H | 1.27978900  | -3.71644000 | -2.89693100 |
| H | -2.74646800 | -1.92970700 | -3.85966400 | C | -4.06714500 | -3.44372300 | -3.01527200 |
| H | -4.40551900 | -3.77760800 | -4.02350000 | C | 3.36717800  | -3.51346600 | -3.40892900 |
| H | 3.31178400  | -4.37643900 | -4.11325600 | H | -1.29649000 | -1.82456400 | -1.69171200 |
| C | -2.71023700 | -2.75885300 | -3.11406100 | H | -3.96984000 | -4.35723800 | -2.38060900 |
| C | 1.98596100  | -2.91248900 | -3.21480800 | H | -5.32590700 | -1.69654300 | -3.10845200 |

|    |             |             |             |    |             |             |             |
|----|-------------|-------------|-------------|----|-------------|-------------|-------------|
| H  | 2.51074800  | -0.90981600 | -2.58537600 | H  | -5.65397500 | 0.59544400  | 1.21314100  |
| H  | 0.94421600  | -1.47896900 | -1.94578800 | H  | 4.86316300  | -1.02332900 | 0.40538900  |
| C  | -2.33300000 | -2.22284400 | -1.74151900 | C  | -1.62825300 | -3.31366700 | 1.44716600  |
| C  | 1.98874100  | -1.80424700 | -2.17502700 | C  | 0.78862000  | -3.65705300 | 1.64204600  |
| C  | -5.10705500 | -2.52691700 | -2.39595600 | H  | -2.64391600 | -3.75337600 | 1.48760900  |
| H  | -3.48451900 | -0.42202800 | -2.07971600 | H  | -5.80767700 | 3.17768500  | 2.10905200  |
| H  | -2.40204900 | -3.09665800 | -1.04728000 | H  | 1.61731000  | -4.28808400 | 2.03665400  |
| H  | -6.05613000 | -3.08986200 | -2.24183300 | H  | 3.69187700  | 1.63806900  | 1.38040600  |
| C  | 3.95805000  | -3.96951700 | -2.08821900 | H  | -3.75651100 | 1.70987100  | 2.25303600  |
| H  | 4.98084100  | -4.38000600 | -2.25533300 | H  | -3.66636100 | -1.55049800 | 1.67913500  |
| H  | 3.33446600  | -4.79248300 | -1.66519100 | C  | -0.57442300 | -4.25039200 | 2.02722600  |
| C  | -3.34471100 | -1.18526000 | -1.27163300 | C  | -2.69689200 | -1.01233500 | 1.61774900  |
| H  | 4.24332800  | -0.07811900 | -1.84863700 | H  | 3.08188800  | -2.30700500 | 1.97590900  |
| H  | -5.77504400 | 2.80423500  | -0.94534500 | C  | 4.33835200  | 0.74368700  | 1.48882200  |
| H  | 5.75290500  | 1.92546200  | -1.91806500 | C  | -0.22145400 | -1.34554000 | 1.88980400  |
| H  | -3.61416200 | 1.64003100  | -0.84344900 | C  | 2.25815200  | -1.57334400 | 1.82676300  |
| H  | 3.54151500  | 1.35921200  | -1.04870700 | C  | 5.77268800  | 1.26441400  | 1.48555100  |
| C  | -4.64774600 | -1.93497200 | -1.06335600 | C  | -1.55991200 | -1.91502900 | 2.09476100  |
| C  | 2.64689700  | -2.23105700 | -0.86818000 | C  | 0.92007200  | -2.21426400 | 2.18823600  |
| H  | 2.03266100  | -3.03691000 | -0.41443900 | H  | -2.72607900 | -0.14955000 | 2.31941300  |
| H  | 4.74077000  | -2.06385800 | -1.50197300 | H  | 6.49346200  | 0.41703900  | 1.56723100  |
| H  | -3.56638900 | 3.90160600  | 0.10984000  | H  | -0.08973800 | -0.26922800 | 1.95976800  |
| C  | 4.02399200  | -2.81593900 | -1.09406700 | H  | 4.13138000  | 0.24225600  | 2.45565500  |
| C  | 4.34983600  | 0.59291800  | -0.96669100 | H  | 2.40280300  | -0.73049700 | 2.53915000  |
| H  | -5.79984200 | 0.42373800  | -0.56880200 | H  | 5.92977500  | 1.92252600  | 2.36769700  |
| H  | -4.51008900 | -2.76618200 | -0.32967600 | C  | -0.69016200 | -4.37370400 | 3.53690800  |
| C  | 5.71637700  | 1.25191200  | -1.03006300 | H  | -1.68015000 | -4.80314400 | 3.81587700  |
| H  | -5.47306000 | -1.29887700 | -0.68046300 | H  | 0.09544300  | -5.06407100 | 3.92314500  |
| C  | -5.98211500 | 2.43247000  | 0.08682800  | C  | -1.68969500 | -2.11558400 | 3.63786400  |
| C  | -3.83430400 | 1.14727900  | 0.13688500  | C  | 0.85296900  | -2.42901300 | 3.75273600  |
| Pd | 0.01734400  | -0.00566300 | -0.12157000 | H  | -2.65201900 | -2.60124600 | 3.91750700  |
| H  | 6.49615200  | 0.46639700  | -1.17809400 | H  | 1.63996600  | -3.13056800 | 4.11020200  |
| H  | -7.08844400 | 2.34810600  | 0.19364100  | C  | -0.52530700 | -2.97918800 | 4.13487200  |
| P  | -2.60863800 | -0.20746800 | 0.01435000  | H  | -1.65439900 | -1.11821000 | 4.13131200  |
| C  | -5.35708500 | 1.04718100  | 0.23709100  | H  | 1.01255900  | -1.44617900 | 4.24696400  |
| H  | -5.85823300 | 4.45312800  | 0.84637200  | H  | -0.58365100 | -3.05526500 | 5.24969600  |
| H  | -2.27593200 | 2.10884000  | 1.30979300  | Cl | 0.13357100  | 1.02863600  | -2.74048800 |
| C  | -3.93561200 | 3.47601700  | 1.07131700  | Zn | 0.23274100  | 2.75293900  | -1.38642300 |
| H  | -1.33617400 | -3.13685800 | 0.39051700  | C  | 0.82356000  | 3.29026800  | 0.44329900  |
| H  | 4.44738800  | -3.20253900 | -0.13537800 | C  | 2.08744700  | 3.87753400  | 0.57134600  |
| P  | 2.46929600  | -0.82224900 | 0.21659700  | C  | -0.02181000 | 3.41224500  | 1.54727800  |
| H  | 5.45324800  | 2.98948000  | 0.23009100  | C  | 2.44880200  | 4.61591800  | 1.70099400  |
| H  | 0.82925600  | -3.70061200 | 0.53258000  | H  | 2.90525300  | 3.64945800  | -0.12678500 |
| C  | -5.45214700 | 3.44311500  | 1.08471100  | C  | 0.33614600  | 4.10007400  | 2.70616500  |
| C  | -3.38329600 | 2.07139700  | 1.26190800  | H  | -0.96661900 | 2.87014100  | 1.49905300  |
| C  | 6.05448700  | 2.04941100  | 0.21603400  | C  | 1.57932600  | 4.72442100  | 2.78624600  |
| C  | 4.12968500  | -0.19005300 | 0.31779700  | H  | 3.44676200  | 5.06361600  | 1.75969800  |
| H  | -3.56767500 | 4.13968200  | 1.88731500  | H  | -0.34836700 | 4.12688800  | 3.56027200  |
| H  | 7.12574200  | 2.35567900  | 0.18334500  | H  | 1.87318400  | 5.26509400  | 3.69141400  |
| H  | -0.68775800 | -5.26710100 | 1.57313900  | Cl | -0.49442600 | 4.55123000  | -2.50526900 |

After PCM corrections, the SCF energy is -  
 5150.44170811 a.u.

Zero-point correction=  
 1.022098 (Hartree/Particle)  
 Thermal correction to Energy=  
 1.071017  
 Thermal correction to Enthalpy=  
 1.071961

Thermal correction to Gibbs Free Energy=  
 0.937497  
 Sum of electronic and zero-point Energies=  
 -5149.400784  
 Sum of electronic and thermal Energies=  
 -5149.351865  
 Sum of electronic and thermal Enthalpies=  
 -5149.350921  
 Sum of electronic and thermal Free Energies=  
 -5149.485386

### Cartesian coordinates of [Pd]-BrPh<sup>+</sup> (C)

#### GEOMETRY OPTIMIZATION

Final Geometry (x,y,z in Angstrom)

|   |             |             |             |   |             |             |             |
|---|-------------|-------------|-------------|---|-------------|-------------|-------------|
| H | 4.56766300  | -1.82254700 | -4.01281200 | H | 6.31836600  | -1.93592900 | -2.26665500 |
| H | -3.56287400 | -4.42256400 | -2.20862000 | H | 3.53328000  | -2.90860600 | -3.09631100 |
| H | -3.45248700 | -3.01447100 | -3.25303400 | C | -5.32549900 | -3.15983700 | -2.18826200 |
| H | -5.82957200 | -3.66766400 | -3.01686200 | C | 5.51665300  | -2.68677000 | -2.26558800 |
| H | 5.90967600  | -3.56301000 | -2.79114200 | H | -2.00488200 | -2.76451600 | -1.29063800 |
| C | -3.81673400 | -3.35942300 | -2.27648400 | H | -5.70238100 | -3.61785100 | -1.26378700 |
| C | 4.29895000  | -2.12840800 | -2.99638500 | H | -5.39930600 | -1.24277700 | -3.16745400 |

|    |             |             |             |    |             |             |             |
|----|-------------|-------------|-------------|----|-------------|-------------|-------------|
| H  | 4.44760400  | -0.12790800 | -2.23281600 | H  | 0.26409200  | -4.52398700 | 1.65387000  |
| H  | 2.82164700  | -0.56446700 | -2.78519700 | H  | -4.15899600 | 1.68236600  | -1.88265100 |
| C  | -3.07529500 | -2.60019900 | -1.17310800 | H  | 4.53582100  | 1.03122600  | -0.28404100 |
| C  | 3.70212200  | -0.93220800 | -2.25122100 | C  | -1.10692100 | -2.86692000 | 1.57146700  |
| C  | -5.66387000 | -1.67468400 | -2.19310100 | C  | 1.36012500  | -2.67214200 | 1.68268500  |
| H  | -3.06716300 | -0.71353100 | -2.19496600 | H  | -1.98775600 | -3.47009800 | 1.82303000  |
| H  | -3.37803000 | -3.00464700 | -0.19859700 | H  | -5.96017400 | 3.33686200  | -0.83363500 |
| H  | -6.74072900 | -1.52060000 | -2.06574600 | H  | 2.29833800  | -3.12936000 | 2.01988600  |
| C  | 5.16688200  | -3.05204700 | -0.82617700 | H  | 2.73484500  | 2.94414600  | 1.26668300  |
| H  | 6.05509100  | -3.40041500 | -0.28844700 | H  | -5.30807200 | 1.18766800  | 0.53104000  |
| H  | 4.45283800  | -3.88626500 | -0.82656700 | H  | -3.42864500 | -1.43444500 | 1.78369100  |
| C  | -3.39506000 | -1.09859000 | -1.21921400 | C  | 0.16548300  | -3.53057700 | 2.10442500  |
| H  | 3.12306100  | 1.66121700  | -2.27681100 | C  | -2.56383800 | -0.76733600 | 1.70403900  |
| H  | -3.05539700 | 4.30151300  | -0.77292400 | H  | 3.38850600  | -0.79951500 | 2.22601100  |
| H  | 4.06447800  | 3.92830400  | -2.57964800 | C  | 3.69515100  | 2.45453000  | 1.06583500  |
| H  | -2.43593400 | 2.22579000  | 0.57714400  | C  | -0.06120900 | -0.58273100 | 1.88094600  |
| H  | 2.27911800  | 2.82414800  | -1.26725700 | C  | 2.43775300  | -0.36287800 | 1.90535100  |
| C  | -4.91887600 | -0.90936100 | -1.09406200 | C  | 4.76612900  | 3.51680400  | 0.79298900  |
| C  | 3.32135700  | -1.33159900 | -0.81668200 | C  | -1.27865000 | -1.46218300 | 2.14625200  |
| H  | 2.58117300  | -2.13254900 | -0.90639800 | C  | 1.25260200  | -1.25683000 | 2.27519900  |
| H  | 5.30032800  | -1.08183900 | 0.05142600  | H  | -2.75940300 | 0.08325200  | 2.36651900  |
| H  | -4.11454700 | 3.80244200  | 1.56487900  | H  | 5.74443200  | 3.02458700  | 0.70962800  |
| C  | 4.54774600  | -1.87370600 | -0.06576700 | H  | -0.17184900 | 0.36188300  | 2.46582900  |
| C  | 3.23676600  | 2.31651000  | -1.40971400 | H  | 3.97364000  | 1.89909900  | 1.96740200  |
| H  | -2.48107700 | 2.19022600  | -1.89455100 | H  | 2.33262800  | 0.59547400  | 2.42525900  |
| H  | -5.25277500 | -1.26842900 | -0.11098100 | H  | 4.83093700  | 4.19170000  | 1.65304100  |
| C  | 4.32003400  | 3.36280300  | -1.67730600 | C  | 0.11009900  | -3.65163800 | 3.62820000  |
| H  | -5.19719400 | 0.14179200  | -1.15871400 | H  | -0.73800700 | -4.27742500 | 3.92967700  |
| C  | -3.86631900 | 3.70460100  | -1.20959600 | H  | 1.01689600  | -4.13954400 | 4.00434500  |
| C  | -3.21185700 | 1.63133300  | 0.07897400  | C  | -1.30931200 | -1.59772100 | 3.71430200  |
| Pd | 0.01471900  | 0.07237800  | -0.14809700 | C  | -1.17787600 | -1.39767900 | 3.82339000  |
| H  | 5.27408800  | 2.85952600  | -1.88521400 | H  | -2.18344200 | -2.20108100 | 3.98976200  |
| H  | -4.04704900 | 4.10328000  | -2.21351100 | H  | 2.10974100  | -1.85853300 | 4.17429700  |
| P  | -2.41482800 | -0.05949000 | -0.00058500 | C  | -0.02583200 | -2.25136800 | 4.22989400  |
| C  | -3.41013700 | 2.24734500  | -1.31744000 | H  | -1.44804700 | -0.60862500 | 4.16984400  |
| H  | -5.39807900 | 4.89760300  | -0.25477600 | H  | 1.11914000  | -0.40321100 | 4.28452200  |
| H  | -4.30323900 | 1.37772900  | 1.95478300  | H  | -0.06864400 | -2.31432800 | 5.32299600  |
| C  | -4.89476900 | 3.23642800  | 1.03817600  | C  | 0.00795000  | 2.01197700  | 0.48916700  |
| H  | -1.05090600 | -2.81138800 | 0.48172800  | C  | -0.07975500 | 2.79705300  | -0.66429200 |
| H  | 4.27766700  | -2.20670800 | 0.94043400  | C  | 0.05591500  | 2.63539900  | 1.73160300  |
| P  | 2.42844800  | 0.03806700  | 0.10129300  | C  | -0.13676600 | 4.18766900  | -0.57485000 |
| H  | 3.56509800  | 4.88824900  | -0.35671800 | H  | -0.09923800 | 2.33288500  | -1.64958100 |
| H  | 1.38992100  | -2.62904500 | 0.59009900  | C  | -0.00108700 | 4.03088700  | 1.81844900  |
| C  | -5.11697600 | 3.84334100  | -0.34483200 | H  | 0.14190200  | 2.08079300  | 2.65986300  |
| C  | -4.47807400 | 1.76541500  | 0.94627200  | C  | -0.10026300 | 4.80904000  | 0.67160100  |
| C  | 4.48484100  | 4.30206700  | -0.48513700 | H  | -0.20544500 | 4.77869300  | -1.48264700 |
| C  | 3.55745600  | 1.51367400  | -0.13862700 | H  | 0.03672100  | 4.50142000  | 2.79596900  |
| H  | -5.80349800 | 3.31652200  | 1.64406200  | H  | -0.14593500 | 5.89014700  | 0.74555800  |
| H  | 5.29061400  | 5.01927100  | -0.67211900 | Br | 0.12032300  | -1.42750400 | -2.13531000 |

After PCM corrections, the SCF energy is -5022.07739880 a.u.

|                                              |                             |
|----------------------------------------------|-----------------------------|
| Zero-point correction=                       | 1.022970 (Hartree/Particle) |
| Thermal correction to Energy=                | 1.068268                    |
| Thermal correction to Enthalpy=              | 1.069212                    |
| Thermal correction to Gibbs Free Energy=     | 0.946297                    |
| Sum of electronic and zero-point Energies=   | -5021.002603                |
| Sum of electronic and thermal Energies=      | -5020.957305                |
| Sum of electronic and thermal Enthalpies=    | -5020.956360                |
| Sum of electronic and thermal Free Energies= | -5021.079276                |

### Cartesian coordinates of [Pd]-Ph<sub>2</sub><sup>+</sup> (D)

#### GEOMETRY OPTIMIZATION

Final Geometry (x,y,z in Angstrom)

|   |             |             |            |   |             |             |            |
|---|-------------|-------------|------------|---|-------------|-------------|------------|
| H | -4.25671900 | -1.40474400 | 4.08425400 | C | -5.70851000 | -1.91812100 | 2.55767800 |
| H | 4.45556400  | -2.99798700 | 2.86360300 | H | 2.54025800  | -1.87314900 | 1.78871400 |
| H | 4.36627300  | -1.31305800 | 3.35521000 | H | 6.24139900  | -2.47062900 | 1.22804500 |
| H | 6.71713100  | -1.89343000 | 2.81877800 | H | 6.01385900  | 0.40412400  | 2.25134900 |
| H | -6.23994000 | -2.65028700 | 3.17417000 | H | -3.89496900 | 0.21931800  | 2.26158300 |
| C | 4.57506600  | -1.97118700 | 2.50195900 | H | -2.44274100 | -0.73578500 | 2.52394700 |
| C | -4.27175300 | -1.75639800 | 3.04724000 | C | 3.54673700  | -1.70326300 | 1.40077100 |
| H | -6.24215000 | -0.96546400 | 2.67468900 | C | -3.47403400 | -0.78824300 | 2.16878500 |
| H | -3.77472100 | -2.73646100 | 3.04333400 | C | 6.14136400  | -0.32776700 | 1.44244900 |
| C | 5.99844100  | -1.73628500 | 2.00792600 | H | 3.48455700  | 0.41998100  | 1.67478800 |



|    |             |             |             |   |             |             |              |
|----|-------------|-------------|-------------|---|-------------|-------------|--------------|
| H  | 3.70911900  | -2.42160500 | 0.58752300  | H | -1.84586700 | 2.46025800  | -1.78851200  |
| H  | 7.14739700  | -0.17219500 | 1.03848900  | H | 4.79210100  | 1.68743300  | -1.79274800  |
| C  | -5.74307800 | -2.33843700 | 1.09044500  | H | 3.56184900  | -1.57889900 | -1.73392500  |
| H  | -6.77614100 | -2.39768200 | 0.73187600  | C | 0.28845500  | -4.09222400 | -1.26497100  |
| H  | -5.31762000 | -3.34557000 | 0.98510000  | C | 2.61806300  | -1.03344300 | -1.83908100  |
| C  | 3.67734000  | -0.27580800 | 0.84950700  | H | -3.24737900 | -2.06520700 | -1.95830700  |
| H  | -4.52133500 | 1.57352400  | 0.70408200  | C | -2.69439300 | -1.92982600 | -2.23185700  |
| H  | 2.08885300  | 4.57342300  | -0.86766100 | C | 0.11129100  | -1.18762800 | -1.83330200  |
| H  | -5.31660000 | 3.81189300  | 0.01910600  | C | -2.39040200 | -1.38277700 | -1.97133700  |
| H  | 1.78362200  | 2.11469500  | -1.56902000 | C | -3.63621500 | 2.94327900  | -2.88863800  |
| H  | -3.17022200 | 2.65345200  | 0.40639900  | C | -1.43168000 | -1.96966800 | -2.00963800  |
| C  | 5.11221700  | -0.03875300 | 0.34415100  | C | -1.07844000 | -2.13846600 | -2.08535100  |
| C  | -3.50399200 | -1.24005600 | 0.70401300  | H | 2.71193300  | -0.41618600 | -2.73775700  |
| H  | -3.05916900 | -2.24550900 | 0.66634700  | H | -4.44199800 | 2.40594300  | -3.40671200  |
| H  | -5.44173100 | -0.38095700 | 0.25058500  | H | 0.07717400  | -0.37101900 | -2.57411700  |
| H  | 2.92191500  | 3.66440200  | -3.18490400 | H | -2.28702500 | 1.26319300  | -2.99956800  |
| C  | -4.95630400 | -1.36296900 | 0.21009100  | H | -2.51808500 | -0.73857600 | -2.84730400  |
| C  | -3.98750500 | 2.11562200  | -0.08117100 | H | -3.09130900 | 3.50213500  | -3.65727600  |
| H  | 2.18489900  | 2.77120300  | 0.80724500  | C | 0.37039300  | -4.66182700 | -2.68395400  |
| H  | 5.31458800  | -0.68615800 | -0.51907800 | H | 1.29687300  | -5.23532300 | -2.80823200  |
| C  | -4.93378700 | 3.12325300  | -0.74148200 | H | -0.46018900 | -5.35529600 | -2.86293100  |
| H  | 5.24341400  | 0.99020000  | 0.00580800  | C | 1.49356000  | -2.55928600 | -3.44055000  |
| C  | 3.06685800  | 4.27498600  | -0.46645500 | C | -0.97424600 | -2.72192700 | -2.571617500 |
| C  | 2.73090700  | 1.84043100  | -1.08407400 | H | 2.44719300  | -3.08747300 | -3.57037700  |
| Pd | -0.02596400 | -0.00880500 | 0.04671400  | H | -1.84000200 | -3.37037300 | -3.70359600  |
| H  | -5.80534900 | 2.59356700  | -1.15014800 | C | 0.32387400  | -3.50829600 | -3.68995100  |
| H  | 3.28707900  | 4.95315600  | 0.36621600  | H | 1.47892100  | -1.74251700 | -4.174251700 |
| P  | 2.36228900  | 0.11938600  | -0.42095200 | H | -1.02330300 | -1.90542600 | -4.24890800  |
| C  | 2.97925800  | 2.83990500  | 0.05758200  | H | 0.38125000  | -3.90066300 | -4.71146000  |
| H  | 4.13750800  | 5.43309600  | -1.94921800 | C | 0.44949800  | -0.28893200 | 2.03612000   |
| H  | 3.59879600  | 1.30990000  | -3.02052200 | C | -0.01505300 | -1.53967400 | -2.43729500  |
| C  | 3.86985700  | 3.41667500  | -2.68746600 | C | 1.22582400  | 0.47360600  | 2.90581200   |
| H  | 1.42513000  | -2.76659000 | 0.01040000  | C | 0.31674400  | -2.03613600 | 3.70183900   |
| H  | -5.00002700 | -1.69358800 | -0.83293700 | H | -0.62336100 | -2.15194400 | 1.77939400   |
| P  | -2.40483700 | -0.28749400 | -0.48129400 | C | 1.55450000  | -0.03009500 | 4.16398000   |
| H  | -3.44014400 | 4.51381300  | -1.42619600 | H | 1.55781600  | 1.46649200  | 2.62759800   |
| H  | -1.10088400 | -2.94588500 | -0.07128800 | C | 1.10274400  | -1.28421500 | 4.56734400   |
| C  | 4.12435500  | 4.41069900  | -1.55795200 | H | -0.04895100 | -3.01389300 | 3.99956000   |
| C  | 3.80864300  | 1.97300900  | -2.17676800 | H | 2.15856500  | 0.57390100  | 4.83408600   |
| C  | -4.23813200 | 3.89601200  | -1.85896200 | H | 1.35453000  | -1.66747900 | 5.55019200   |
| C  | -3.41987600 | 1.14759900  | -1.12658300 | C | -0.64387400 | 1.74368600  | 1.05994500   |
| H  | 4.65043900  | 3.49411600  | -3.45151400 | C | -1.30831100 | 1.95575000  | 2.26936000   |
| H  | -4.94065700 | 4.58244100  | -2.34273100 | C | -0.37387400 | 2.84560100  | 0.24780300   |
| H  | 0.32308900  | -4.90872000 | -0.53452800 | C | -1.68602400 | 3.24198100  | 2.65537500   |
| H  | 3.91971400  | 2.59210400  | 0.56360500  | H | -1.52262200 | 1.13338600  | 2.93785100   |
| H  | -4.26823300 | 0.62318800  | -1.59480400 | C | -0.74618600 | 4.13509900  | 0.63861000   |
| C  | 1.46532700  | -3.14287900 | -1.01826600 | C | -1.40227600 | 4.33888600  | 1.84700000   |
| C  | -1.02088500 | -3.31625800 | -1.10046600 | H | -2.20051900 | 3.37953500  | 3.60144100   |
| H  | 2.41238800  | -3.68772300 | -1.12736000 | H | -0.51732200 | 4.97469400  | -0.01075100  |
| H  | 5.11852600  | 4.22874400  | -1.12819200 | H | -1.68855900 | 5.33880800  | 2.15506500   |
| H  | -1.87876000 | -3.97998100 | -1.27233900 | H | 0.12475000  | 2.72460000  | -0.70789300  |

After PCM corrections, the SCF energy is -2682.01848758 a.u.

|                                              |                             |
|----------------------------------------------|-----------------------------|
| Zero-point correction=                       | 1.112550 (Hartree/Particle) |
| Thermal correction to Energy=                | 1.161096                    |
| Thermal correction to Enthalpy=              | 1.162041                    |
| Thermal correction to Gibbs Free Energy=     | 1.033487                    |
| Sum of electronic and zero-point Energies=   | -2680.858179                |
| Sum of electronic and thermal Energies=      | -2680.809633                |
| Sum of electronic and thermal Enthalpies=    | -2680.808688                |
| Sum of electronic and thermal Free Energies= | -2680.937242                |

## Cartesian coordinates of [Pd]-PhBrPh (A)

### GEOMETRY OPTIMIZATION

Final Geometry (x,y,z in Angstrom)

|   |             |             |            |   |             |             |            |
|---|-------------|-------------|------------|---|-------------|-------------|------------|
| H | -4.55726300 | -1.26746200 | 4.13105300 | H | -6.30430500 | -1.75070000 | 2.45196000 |
| H | 3.82694800  | -3.81462300 | 3.14841300 | H | -3.46815300 | -2.43304700 | 3.38695500 |
| H | 4.03709900  | -2.14010700 | 3.63505400 | C | 5.57941600  | -2.85622800 | 2.30895900 |
| H | 6.25382100  | -3.11009100 | 3.13479700 | C | -5.46468400 | -2.45215200 | 2.55863700 |
| H | -5.80956100 | -3.25330400 | 3.22222200 | H | 2.14898800  | -2.37626500 | 2.06304400 |
| C | 4.13036100  | -2.82719600 | 2.78289600 | H | 5.69800000  | -3.64437100 | 1.55260400 |
| C | -4.27472000 | -1.71976600 | 3.17357700 | H | 5.98058900  | -0.74283700 | 2.47753800 |

|    |             |             |             |    |             |             |             |
|----|-------------|-------------|-------------|----|-------------|-------------|-------------|
| H  | -4.54091400 | 0.10420400  | 2.07693600  | H  | 6.23529700  | 3.04954400  | -0.48828200 |
| H  | -2.90045800 | -0.12235600 | 2.68875900  | H  | -2.36546000 | -3.66339500 | -1.65836600 |
| C  | 3.16559200  | -2.38374900 | 1.67991200  | H  | -2.98677300 | 2.60393300  | -1.95510600 |
| C  | -3.74727200 | -0.63844000 | 2.22950500  | H  | 5.09072400  | 0.87681000  | -1.54552900 |
| C  | 5.96784200  | -1.51488700 | 1.69604100  | H  | 3.35275000  | -1.98798900 | -1.51012900 |
| H  | 3.53428900  | -0.29576100 | 1.98405300  | C  | -0.23249500 | -4.05553000 | -1.63030500 |
| H  | 3.19446200  | -3.11351200 | 0.85986400  | C  | 2.52173900  | -1.28426200 | -1.62931700 |
| H  | 6.98196800  | -1.55778600 | 1.28171300  | H  | -3.42624400 | -1.25254400 | -2.15823900 |
| C  | -5.10624700 | -3.02141000 | 1.18825900  | C  | -3.87116800 | 1.99140600  | -1.74873100 |
| H  | -5.98232800 | -3.49264900 | 0.72730800  | C  | 0.00309800  | -1.10519000 | -1.74975300 |
| H  | -4.35342100 | -3.81151500 | 1.31006200  | C  | -2.44404100 | -0.83381300 | -1.91422700 |
| C  | 3.54806800  | -1.00003600 | 1.14243200  | C  | -5.13266800 | 2.86116900  | -1.79079600 |
| H  | -3.56616800 | 1.93867000  | 1.71881300  | C  | 1.21918000  | -2.02039200 | -1.97446900 |
| H  | 3.47828600  | 4.11904200  | 0.30168100  | C  | -1.29999000 | -1.82876500 | -2.11517400 |
| H  | -4.97204500 | 3.95842000  | 1.49840100  | H  | 2.79716100  | -0.63562000 | -2.46362200 |
| H  | 2.42601900  | 2.09619200  | -0.71080300 | H  | -6.01519700 | 2.20982900  | -1.71815300 |
| H  | -2.86654300 | 3.05548400  | 0.57741300  | H  | 0.07346200  | -0.30359500 | -2.48383300 |
| C  | 4.98831200  | -1.09630400 | 0.59479100  | H  | -3.93906800 | 1.24730000  | -2.54710800 |
| C  | -3.33884200 | -1.25193800 | 0.88341200  | H  | -2.26930300 | -0.00407900 | -2.62970300 |
| H  | -2.58760800 | -2.01191500 | 1.10827300  | H  | -5.19679800 | 3.36254800  | -2.76334100 |
| H  | -5.33943500 | -1.22640800 | 0.01280900  | C  | -0.17372200 | -4.39143000 | -3.12153100 |
| H  | 3.77009700  | 3.54450700  | -2.23307700 | H  | 0.67418000  | -5.05673800 | -3.33090500 |
| C  | -4.54646100 | -1.95224500 | 0.24215600  | H  | -1.08348900 | -4.92267700 | -3.43070100 |
| C  | -3.71041200 | 2.38186100  | 0.73230900  | C  | 1.25838700  | -2.37602000 | -3.48428300 |
| H  | 3.25186300  | 2.04625300  | 1.62246600  | C  | -1.23095600 | -2.18178800 | -3.62363100 |
| H  | 5.01768000  | -1.85057700 | -0.20181800 | H  | 2.12577200  | -3.01844600 | -3.69279000 |
| C  | -4.99630600 | 3.21003200  | 0.69842400  | H  | -2.15893300 | -2.68444200 | -3.93870000 |
| H  | 5.33109000  | -0.16312000 | 0.14975900  | C  | -0.02918500 | -3.08762600 | -3.91055800 |
| C  | 4.36859000  | 3.50382700  | 0.48879100  | H  | 1.38952700  | -1.45825600 | -4.07470200 |
| C  | 3.27134700  | 1.44515900  | -0.47060100 | H  | -1.15529700 | -1.25836800 | -4.21387200 |
| Pd | 0.00763900  | 0.13751600  | 0.08054500  | H  | 0.01509500  | -3.30301800 | -4.98568600 |
| H  | -5.85958700 | 2.56077200  | 0.90274000  | C  | 0.04691400  | 1.79608700  | -1.18261200 |
| H  | 4.85533000  | 3.92010700  | 1.37800300  | C  | 0.72470700  | 1.84241000  | -2.41051600 |
| P  | 2.39443700  | -0.19769400 | -0.11903200 | C  | -0.61297900 | 2.96979600  | -0.80326300 |
| C  | 3.93987900  | 2.06230400  | 0.77290200  | C  | 0.72297300  | 2.98090700  | -3.21905900 |
| H  | 5.57532500  | 4.62111300  | -0.92445200 | H  | 1.30037700  | 0.99572600  | -2.76296400 |
| H  | 3.70217600  | 1.13756100  | -2.58681300 | C  | -0.62720100 | 4.11089700  | -1.60667300 |
| C  | 4.64986500  | 2.95273900  | -1.94701200 | H  | -1.09183100 | 3.01342300  | 0.16220000  |
| H  | 1.03383200  | -3.15670500 | -0.13054400 | C  | 0.03549600  | 4.12375700  | -2.82842500 |
| H  | -4.27154100 | -2.43237800 | -0.70028600 | H  | 1.27127200  | 2.96385300  | -4.15694400 |
| P  | -2.42695100 | -0.04675600 | -0.23955600 | H  | -1.15960500 | 4.99304700  | -1.26152300 |
| H  | -4.36978000 | 4.61890100  | -0.80319800 | H  | 0.02787000  | 5.00886100  | -3.45665200 |
| H  | -1.49844900 | -2.97133400 | -0.27531500 | Br | -0.19161700 | -1.84307400 | 1.74193000  |
| C  | 5.30082200  | 3.58055000  | -0.71751300 | C  | 0.15209800  | 1.45677300  | 1.81712700  |
| C  | 4.20665400  | 1.50878900  | -1.68967600 | C  | 0.81408700  | 2.69445700  | 1.78268200  |
| C  | -5.17502900 | 3.88565200  | -0.65930800 | C  | -0.40095200 | 1.10871000  | 3.05929900  |
| C  | -3.73128000 | 1.31604700  | -0.37711100 | C  | 0.91471700  | 3.53203900  | 2.89607000  |
| H  | 5.33718600  | 2.97667800  | -2.80072300 | H  | 1.25818400  | 3.04906800  | 0.85844500  |
| H  | -6.11682100 | 4.44534600  | -0.69020100 | C  | -0.32652200 | 1.94322600  | 4.17603600  |
| H  | -0.33582900 | -4.97729700 | -1.04516300 | H  | -0.88123600 | 0.14538600  | 3.17977900  |
| H  | 4.82827800  | 1.49399000  | 1.06729400  | C  | 0.33553800  | 3.16420900  | 4.10503100  |
| H  | -4.64982700 | 0.72849300  | -0.22784200 | H  | 1.44833000  | 4.47559500  | 2.80885900  |
| C  | 1.06007900  | -3.34146400 | -1.20632700 | H  | -0.78549000 | 1.62483800  | 5.10897400  |
| C  | -1.44289100 | -3.15133000 | -1.34945400 | H  | 0.40245200  | 3.81280100  | 4.97363600  |
| H  | 1.92347900  | -3.98947000 | -1.41757100 |    |             |             |             |

After PCM corrections, the SCF energy is -5253.74970061 a.u.

|                                              |                             |
|----------------------------------------------|-----------------------------|
| Zero-point correction=                       | 1.115547 (Hartree/Particle) |
| Thermal correction to Energy=                | 1.165521                    |
| Thermal correction to Enthalpy=              | 1.166466                    |
| Thermal correction to Gibbs Free Energy=     | 1.035018                    |
| Sum of electronic and zero-point Energies=   | -5252.622230                |
| Sum of electronic and thermal Energies=      | -5252.572256                |
| Sum of electronic and thermal Enthalpies=    | -5252.571311                |
| Sum of electronic and thermal Free Energies= | -5252.702759                |

## Cartesian coordinates of [Pd]-PhBrPh (A')

### GEOMETRY OPTIMIZATION

Final Geometry (x,y,z in Angstrom)

|   |             |             |             |   |             |             |             |
|---|-------------|-------------|-------------|---|-------------|-------------|-------------|
| H | 3.39577800  | -3.50566700 | -3.30611200 | H | -6.34003900 | -3.69537200 | -1.76506600 |
| H | -4.15941300 | -4.46174600 | -0.74915200 | H | 5.21835000  | -4.62421100 | -1.97716100 |
| H | -3.90331500 | -3.46502600 | -2.17197500 | C | -4.27718600 | -3.44497300 | -1.14059900 |

|    |             |             |             |    |             |             |             |
|----|-------------|-------------|-------------|----|-------------|-------------|-------------|
| C  | 3.48617300  | -3.33937400 | -2.22702000 | H  | 4.53847000  | 0.77395100  | 0.53620800  |
| H  | 5.60344300  | -2.94748800 | -2.34328400 | C  | -1.35876000 | -2.38935500 | 2.51550200  |
| H  | 2.81277500  | -4.06011300 | -1.74533000 | C  | 1.16920300  | -2.36660800 | 2.73606600  |
| C  | -5.74318300 | -3.02916700 | -1.13169700 | H  | -2.28024900 | -2.79810000 | 2.95248800  |
| C  | 4.92151900  | -3.58976900 | -1.76878100 | H  | -5.59419500 | 3.56356800  | -1.56452700 |
| H  | -2.37585600 | -2.82896300 | -0.35712300 | H  | 2.00190000  | -2.69469200 | 3.37405900  |
| H  | -6.14432700 | -3.12141100 | -0.11262200 | H  | 2.61198700  | 3.07873200  | 0.03726700  |
| H  | -5.58671900 | -1.51725600 | -2.65602100 | H  | -5.20362100 | 1.74057600  | 0.27083700  |
| H  | 3.62854600  | -1.20849800 | -2.45871000 | H  | -3.52980000 | -0.74306000 | 2.07665200  |
| H  | 1.99124400  | -1.76788100 | -2.21320500 | C  | -0.14498200 | -2.92549200 | 3.29827500  |
| C  | -3.40904700 | -2.48961700 | -0.31860800 | C  | -2.60001700 | -0.19414000 | 1.89181400  |
| C  | 3.02175200  | -1.92077100 | -1.89206100 | H  | 3.31446200  | -0.80443700 | 2.43656100  |
| C  | -5.88000800 | -1.58560300 | -1.59946100 | C  | 3.42938300  | 2.60026000  | 0.58308900  |
| H  | -3.18677300 | -1.01559000 | -1.85906500 | C  | -0.10019100 | -0.25672500 | 2.01258900  |
| H  | -3.73213700 | -2.53763100 | 0.72979000  | C  | 2.42847200  | -0.24579200 | 2.11262500  |
| H  | -6.92412200 | -1.25608000 | -1.54437500 | C  | 4.67628100  | 3.48429800  | 0.51152900  |
| C  | 5.08602200  | -3.28613100 | -0.28084900 | C  | -1.39326400 | -0.85838500 | 2.57106600  |
| H  | 6.13152700  | -3.41138800 | 0.02465600  | C  | 1.14836900  | -0.83297200 | 2.71555100  |
| H  | 4.50003400  | -4.00699700 | 0.30600400  | H  | -2.73020500 | 0.79426000  | 2.34689900  |
| C  | -3.52555300 | -1.04107600 | -0.81650000 | H  | 5.48083200  | 3.03829600  | 1.11421700  |
| H  | 4.39436900  | 0.42757100  | -1.93402500 | H  | -0.15230100 | 0.78828800  | 2.27585900  |
| H  | -2.61816900 | 4.27679500  | -1.57538600 | H  | 3.10364800  | 2.52661000  | 1.62340400  |
| H  | 5.67357700  | 2.41150800  | -2.62527300 | H  | 2.55823500  | 0.77785900  | 2.47885700  |
| H  | -2.24351400 | 2.48395900  | 0.21578800  | H  | 4.45091800  | 4.45825400  | 0.96034200  |
| H  | 3.32956500  | 1.80942700  | -2.06688300 | C  | -0.24236600 | -2.50602300 | 4.76786500  |
| C  | -5.00768200 | -0.62817600 | -0.78054700 | H  | -1.16090700 | -2.89977700 | 5.22137800  |
| C  | 3.15980200  | -1.66344800 | -0.38351400 | H  | 0.60055500  | -2.91949700 | 2.34689900  |
| H  | 2.55896100  | -2.43499700 | 0.11215000  | C  | -1.44932700 | -0.44798100 | 4.07053800  |
| H  | 5.26677700  | -1.14848100 | -0.45729800 | C  | 1.03810600  | -0.41044100 | 4.20832700  |
| H  | -3.76400000 | 4.38966700  | 0.74626100  | H  | -2.37765000 | -0.83519800 | 4.51292700  |
| C  | 4.61862700  | -1.86713900 | 0.05923400  | H  | 1.92215600  | -0.77291400 | 4.75030600  |
| C  | 4.15600000  | 1.39178600  | -1.48335500 | C  | -0.23981100 | -0.97690700 | 4.83893900  |
| H  | -2.19192000 | 1.93710600  | -2.17195000 | H  | -1.49161100 | 0.64646200  | 4.14548900  |
| H  | -5.36345700 | -0.61899300 | 0.25910200  | H  | 1.04129400  | 0.68405400  | 4.29243100  |
| C  | 5.39031400  | 2.29380400  | -1.57315500 | H  | -0.30135800 | -0.65086700 | 5.88463200  |
| H  | -5.14574200 | 0.37882200  | -1.17241400 | C  | -0.23115200 | -1.80253700 | -1.03436000 |
| C  | -3.46587300 | 3.67052500  | -1.91681700 | C  | -0.81258600 | -1.80443500 | -2.31719300 |
| C  | -3.06073800 | 1.87225400  | -0.18348600 | C  | 0.10161600  | -3.06970200 | -0.54140800 |
| Pd | 0.04630700  | 0.15087500  | -0.10644100 | C  | -1.02306800 | -2.97254700 | -3.04819500 |
| H  | 6.23816500  | 1.80044200  | -1.07554100 | H  | -1.08578300 | -0.86663400 | -2.78363000 |
| H  | -3.57793100 | 3.85806900  | -2.99069800 | C  | -0.10218600 | -4.25218200 | -1.26042000 |
| P  | -2.37242000 | 0.15438700  | 0.08545600  | H  | 0.52282500  | -3.17949000 | 0.44373700  |
| C  | -3.14113800 | 2.19282400  | -1.68683100 | C  | -0.66565200 | -4.21326000 | -2.52774400 |
| H  | -4.91304800 | 5.16691800  | -1.31790500 | H  | -1.46588800 | -2.90298700 | -4.03850200 |
| H  | -4.20199600 | 2.13994300  | 1.65411000  | H  | 0.18437500  | -5.20119900 | -0.81421200 |
| C  | -4.59007500 | 3.79810000  | 0.32960100  | H  | -0.82444300 | -5.12430400 | -3.09657100 |
| H  | -1.31584500 | -2.72885200 | 1.48034100  | Br | 0.69113500  | 0.94236700  | -2.55227500 |
| H  | 4.74291000  | -1.68956900 | 1.13352500  | C  | 0.16465800  | 2.29417400  | 0.49704400  |
| P  | 2.37271400  | -0.08512100 | 0.25717000  | C  | 0.42747100  | 2.81443300  | 1.77522900  |
| H  | 4.39087500  | 4.19984400  | -1.49696200 | C  | -0.05424000 | 3.27377300  | -0.49117300 |
| H  | 1.38241200  | -2.76705800 | 1.74814700  | C  | 0.45953200  | 4.18289300  | 2.05975800  |
| C  | -4.72233400 | 4.09897800  | -1.16216600 | H  | 0.65867700  | 2.17072300  | 2.61850100  |
| C  | -4.32309200 | 2.30990400  | 0.57876600  | C  | -0.02519800 | 4.64297700  | -0.22545800 |
| C  | 5.15456200  | 3.65509700  | -0.92654200 | H  | -0.23250300 | 2.96814800  | -1.51336500 |
| C  | 3.70139000  | 1.22061100  | -0.02672900 | C  | 0.22965700  | 5.11503000  | 1.05820500  |
| H  | -5.49762400 | 4.10088800  | 0.86491800  | H  | 0.68101000  | 4.50931900  | 3.07282200  |
| H  | 6.06800400  | 4.26012200  | -0.96094100 | H  | -0.19868000 | 5.34173500  | -1.04014100 |
| H  | -0.13216100 | -4.01982600 | 3.22587000  | H  | 0.25657000  | 6.17988100  | 1.26877700  |
| H  | -3.91336100 | 1.58245100  | -2.17108600 |    |             |             |             |

After PCM corrections, the SCF energy is -5253.74795056 a.u.

|                                              |                             |
|----------------------------------------------|-----------------------------|
| Zero-point correction=                       | 1.115217 (Hartree/Particle) |
| Thermal correction to Energy=                | 1.165346                    |
| Thermal correction to Enthalpy=              | 1.166290                    |
| Thermal correction to Gibbs Free Energy=     | 1.035188                    |
| Sum of electronic and zero-point Energies=   | -5252.617175                |
| Sum of electronic and thermal Energies=      | -5252.567046                |
| Sum of electronic and thermal Enthalpies=    | -5252.566101                |
| Sum of electronic and thermal Free Energies= | -5252.697203                |

### Cartesian coordinates of [Pd]-Br (3)

GEOMETRY OPTIMIZATION

Final Geometry (x,y,z in Angstrom)

|    |             |             |             |    |             |             |             |
|----|-------------|-------------|-------------|----|-------------|-------------|-------------|
| H  | -3.81963600 | -1.56727900 | 4.14837500  | C  | 2.71851000  | 4.11976200  | -1.22972300 |
| H  | 2.40889300  | -2.13742400 | 4.51019100  | H  | 1.40102900  | -2.62107100 | 0.09141600  |
| H  | 3.44328100  | -0.73057200 | 4.31267600  | H  | -5.01905000 | -1.33877800 | -0.68748900 |
| H  | 4.83200300  | -2.78380800 | 4.34968900  | P  | -2.30097400 | -0.07723900 | -0.38535700 |
| H  | -5.98101700 | -2.54833300 | 3.33307100  | H  | -2.58033500 | 4.78471100  | -0.32388700 |
| C  | 3.07596300  | -1.63202100 | 3.80279200  | H  | -1.08284000 | -2.73727200 | -0.13543100 |
| C  | -3.95735400 | -1.80590100 | 3.08790600  | C  | 4.22150300  | 4.16381500  | -1.49794000 |
| H  | -5.87570900 | -0.82833100 | 2.98106200  | C  | 2.20188100  | 2.68194800  | -1.15796800 |
| H  | -3.55006900 | -2.81617500 | 2.93985700  | C  | -3.47979600 | 4.45682100  | -0.86159700 |
| C  | 4.25895100  | -2.53142000 | 3.45015900  | C  | -3.21747200 | 1.49500700  | -0.79279700 |
| C  | -5.44320600 | -1.80696700 | 2.73111400  | H  | 2.17512900  | 4.67022500  | -2.00629100 |
| H  | 1.46851600  | -0.54398100 | 2.82730000  | H  | -4.02348400 | 5.36319600  | -1.15184300 |
| H  | 3.88327200  | -3.47999100 | 3.04168100  | H  | 0.31367500  | -4.70720300 | -0.66946700 |
| H  | 5.63146500  | -0.97570200 | 2.86239900  | H  | 4.70701600  | 1.40111600  | -1.13514100 |
| H  | -3.48752800 | 0.20664000  | 2.47007100  | H  | -4.12754600 | 1.19843000  | -1.33669700 |
| H  | -2.10234700 | -0.85471700 | 2.46715200  | C  | 1.50011000  | -2.92527600 | -0.95732600 |
| C  | 2.28816300  | -1.21681000 | 2.55936300  | C  | -0.98169000 | -3.05598300 | -1.18008800 |
| C  | -3.16970600 | -2.16970900 | 2.23017100  | H  | 2.44828000  | -3.47304200 | -0.79279700 |
| C  | 5.16521600  | -1.86530200 | 2.41671300  | H  | 4.42470400  | 3.74898200  | -2.49536200 |
| H  | 3.61254000  | 0.36462700  | 2.01764300  | H  | -1.83840400 | -3.70289700 | -1.41720900 |
| H  | 1.83153700  | -2.10802100 | 2.10832700  | H  | -1.41990900 | 2.60345900  | -1.18456900 |
| H  | 5.98354000  | -2.53706200 | 2.13228100  | H  | 2.30710100  | 2.21626900  | -2.14846800 |
| C  | -5.65405100 | -2.08376800 | 1.24304600  | H  | 3.64492600  | -1.30422000 | -1.42099900 |
| H  | -6.72024100 | -2.04198300 | 0.99168800  | C  | 0.32840600  | -3.83637800 | -1.33665800 |
| H  | -5.31798700 | -3.10442900 | 1.01350600  | C  | 2.69645800  | -0.76109300 | -1.48402800 |
| C  | 3.20588800  | -0.53553400 | 1.53394100  | H  | -3.17700000 | -1.69187800 | -2.05787000 |
| H  | -4.27432500 | 1.70846700  | 1.09940600  | C  | -2.35178000 | 2.36807300  | -1.71484200 |
| H  | 4.86981000  | 3.83469500  | 0.53041500  | C  | 0.19628600  | -0.90681200 | -1.71828900 |
| H  | -4.58779000 | 4.15581200  | 0.97583200  | C  | -2.30049600 | -1.03777700 | -1.97429700 |
| H  | 2.75679400  | 2.31665900  | 0.86961600  | C  | -3.06449200 | 3.66538600  | -2.09949900 |
| H  | -2.71999700 | 2.52381300  | 1.03879600  | C  | 1.52939800  | -1.68022200 | -1.85610500 |
| C  | 4.38322600  | -1.44866700 | 1.16813000  | C  | -0.98947800 | -1.82188200 | -2.09678600 |
| C  | -3.38610600 | -1.10027500 | 0.73808300  | H  | 2.81549600  | 0.00262500  | -2.26320300 |
| H  | -3.01495600 | -2.11843300 | 0.55196400  | H  | -3.95566400 | 3.42983200  | -2.69801100 |
| H  | -5.29184900 | -0.08800300 | 0.51801400  | H  | 0.22145400  | -0.07009300 | -2.43923500 |
| H  | 2.50239000  | 4.62424700  | -0.27860900 | H  | -2.06685300 | 1.82070800  | -2.62044300 |
| C  | -4.87704400 | -1.09258100 | 0.37179800  | H  | -2.36498900 | -0.31357500 | -2.79524700 |
| C  | -3.61979500 | 2.29952900  | 0.45275600  | H  | -2.40945300 | 4.26835400  | -2.73898500 |
| H  | 5.02796400  | 1.38038700  | 0.41593900  | C  | 0.48929300  | -4.29911600 | -2.78760800 |
| H  | 4.00109600  | -2.34905800 | 0.66980400  | H  | 1.41773900  | -4.87365800 | -2.90083100 |
| C  | -4.33283200 | 3.59779200  | 0.06784800  | H  | -0.33656400 | -4.96567100 | -3.06792300 |
| H  | 5.05566000  | -0.95681600 | 0.45606600  | C  | 1.67890000  | -2.15957700 | -3.31638700 |
| C  | 4.98800800  | 3.35739000  | -0.45181800 | C  | -0.80683200 | -2.30516200 | -3.55184500 |
| C  | 2.97115800  | 1.86709900  | -0.11117400 | H  | 2.62991000  | -2.69676400 | -3.43854600 |
| Pd | -0.03799600 | 0.13029400  | 0.07386700  | H  | -1.64954800 | -2.94859400 | -3.84135500 |
| H  | -5.28344000 | 3.35866100  | -0.43042600 | C  | 0.51045100  | -3.07234300 | -3.70487300 |
| H  | 6.06134400  | 3.36078400  | -0.67435300 | H  | 1.71585400  | -1.28950200 | -3.98614100 |
| P  | 2.26207800  | 0.15848200  | 0.06786900  | H  | -0.82019100 | -1.43908500 | -4.22751500 |
| C  | 4.48196900  | 1.91418700  | -0.36969500 | H  | 0.62822000  | -3.39137600 | -4.74796400 |
| H  | 4.57701400  | 5.20033600  | -1.51264600 | Br | -0.17854800 | 1.67315800  | 2.08573400  |
| H  | 1.13581400  | 2.66843300  | -0.90901500 |    |             |             |             |

After PCM corrections, the SCF energy is -5253.74795056 a.u.

|                                              |                             |
|----------------------------------------------|-----------------------------|
| Zero-point correction=                       | 1.115217 (Hartree/Particle) |
| Thermal correction to Energy=                | 1.165346                    |
| Thermal correction to Enthalpy=              | 1.166290                    |
| Thermal correction to Gibbs Free Energy=     | 1.035188                    |
| Sum of electronic and zero-point Energies=   | -5252.617175                |
| Sum of electronic and thermal Energies=      | -5252.567046                |
| Sum of electronic and thermal Enthalpies=    | -5252.566101                |
| Sum of electronic and thermal Free Energies= | -5252.697203                |
